# Supplementary material for: Cell-Free DNA Provides a Good Representation of the Tumor Genome Despite Its Biased Fragmentation Patterns
Source: PLOS journal article supplement (doi:10.1371/journal.pone.0169231), 2017-01-03
Supplement: S6 (10.1371/journal.pone.0169231.s006) [file journal.pone.0169231.s006]

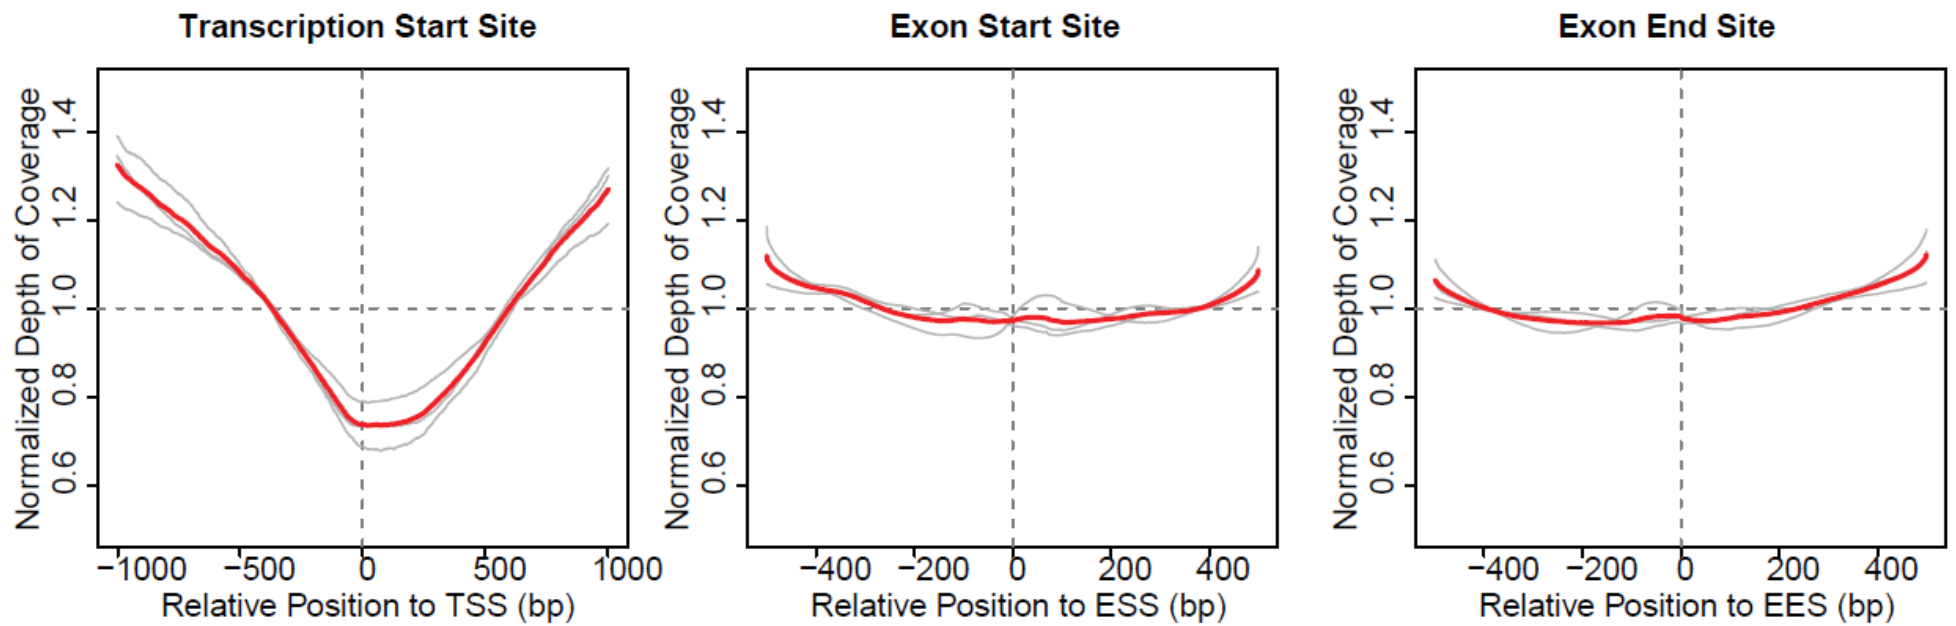

**S5 Fig. Normalized coverage depth near the TSS, ESS, and EES in the 1000 Genome Project.**

Coverage depth at each nucleotide normalized to regional mean depth within  $\pm 1000$ bp of the TSS and  $\pm 500$ bp of the ESS and EES in randomly selected samples from the 1000 Genome Project. Each grey line represents a sample. Red lines represent the mean value of all samples.
